# Supplementary material
Source: publisher figshare collection journal article supplement (https://acs.figshare.com/ndownloader/files/13868897)
Supplement: Supplementary file 1 [file 13868897]

# Polymer Conformations and Dynamics under Confinement with Two Length Scales

Tianren Zhang,<sup>†</sup> Karen I. Winey,<sup>\*,†,‡</sup> and Robert A. Riggleman<sup>\*,†</sup>

<sup>†</sup>Department of Chemical and Biomolecular Engineering and <sup>‡</sup> Department of Materials Science and Engineering, University of Pennsylvania, Philadelphia, Pennsylvania 19104, United States

## Supporting Information

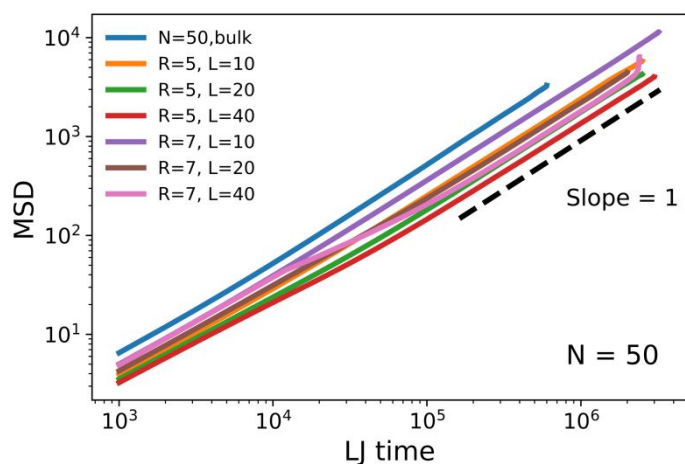

Figure S1. Mean square displacement of center of mass of polymers with  $N = 50$  for all confined conditions.

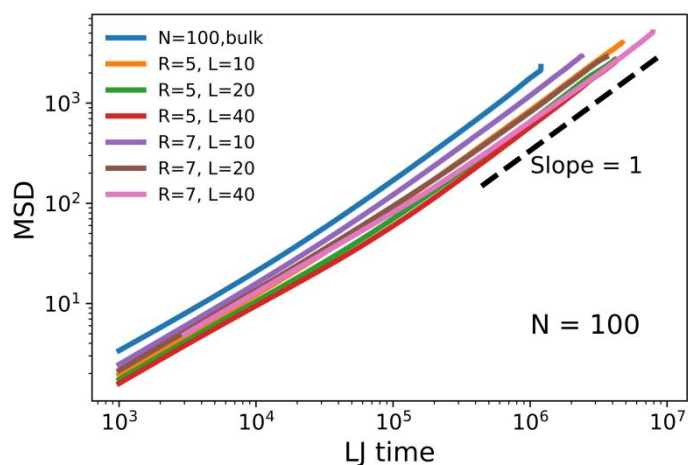

Figure S2. Mean square displacement of center of mass of polymers with  $N = 100$  for all confined conditions.

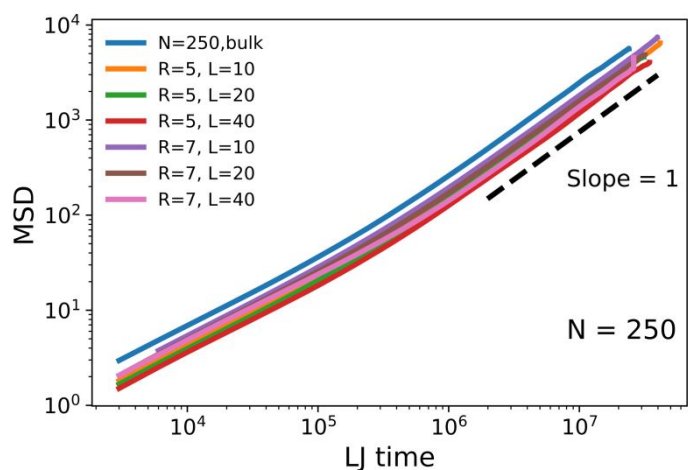

Figure S3. Mean square displacement of center of mass of polymers with  $N = 250$  for all confined conditions.
